# Supplementary material for: Ultra-performance liquid chromatography/mass spectrometry technology and high-throughput metabolomics for deciphering the preventive mechanism of mirabilite on colorectal cancer via the modulation of complex metabolic networks
Source: Royal Society of Chemistry journal article supplement (doi:10.1039/c9ra07687e), 2019-01-01
Supplement: c9ra07687e1.pdf [file c9ra07687e1.pdf]

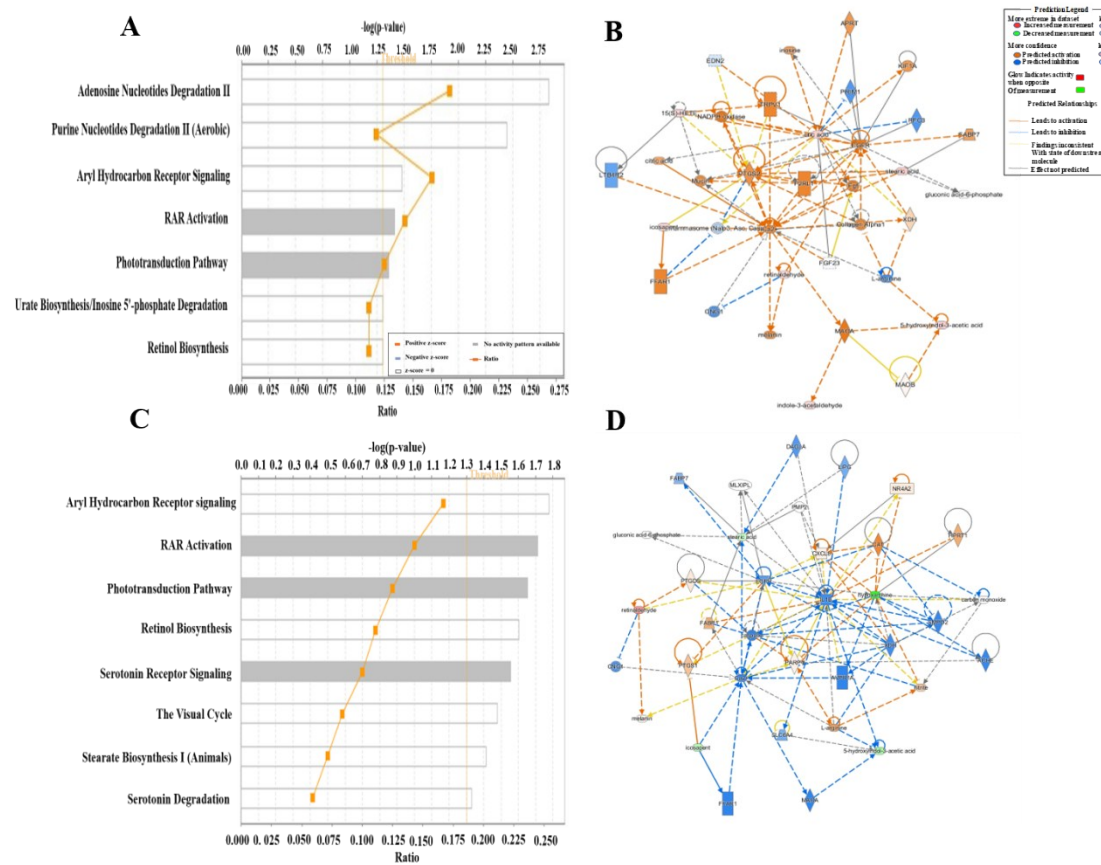

Figure S1 The IPA of potential biomarkers according to relative intensity analysis. A showed the most enriched pathways in the  $APC^{min/+}$  mice. B manifested the prediction networks that associated with CRC in this study. The pathways (C) were ones related to the efficacy of mirabilite. And the network in D was a prediction network about the mechanism of action of mirabilite.

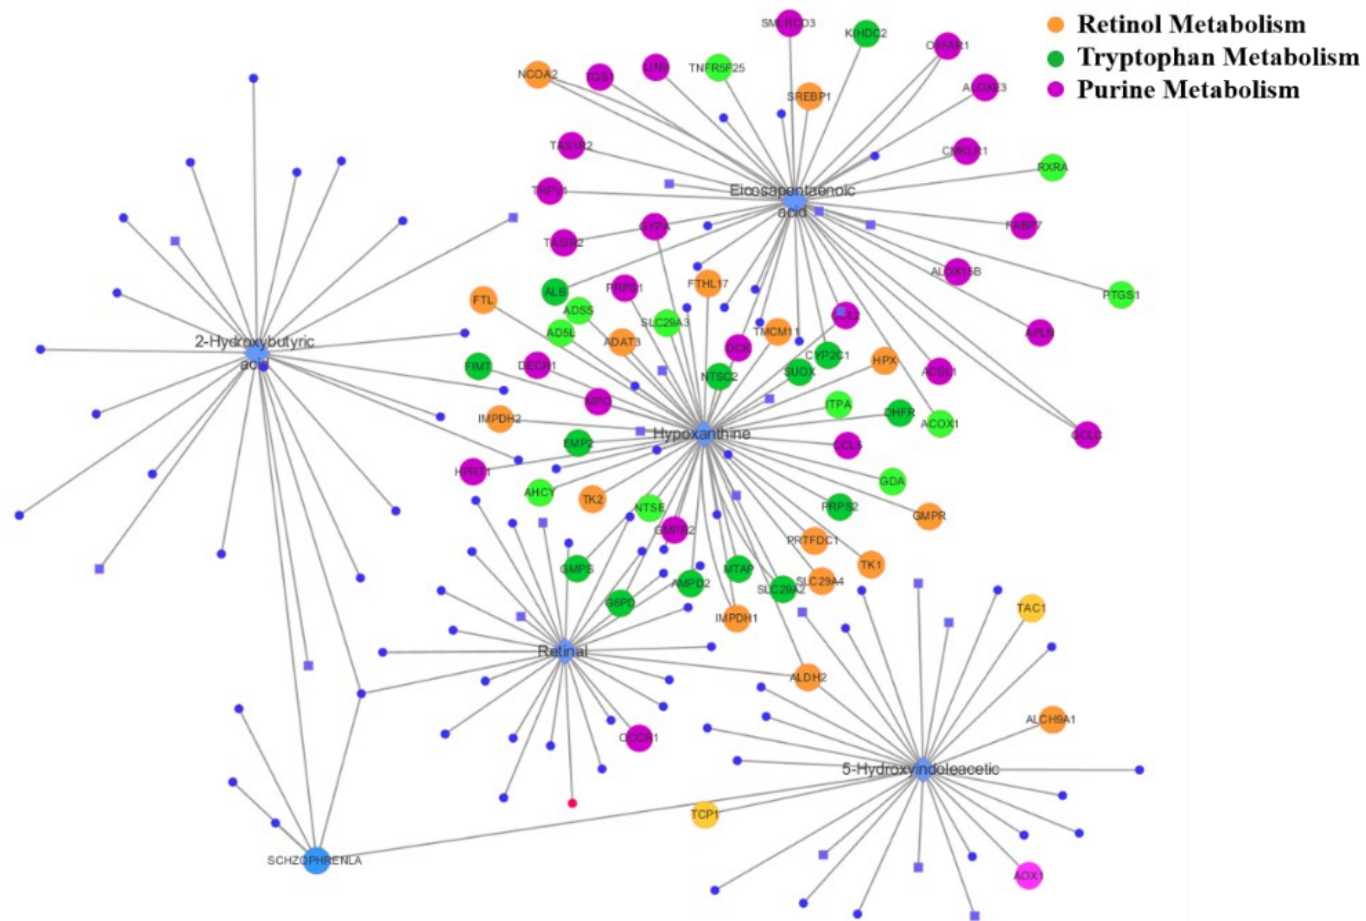

Figure S2 The network exploration of core metabolism by MetaboAnalyst 4.0.

The red, green, and purple circles represent genes associated with retinol acid metabolism, tryptophan metabolism, and purine metabolism, respectively.

Table S1 Potential biomarkers in the serum of CON, MOD and Mirabilite-treated mice

| Index | Compounds                  | MS/MS fragment ion (m/z)                                                                                                                                                                                                                                                                                                                                                                                                                  | CON                | MOD                | Mirabilite         |
|-------|----------------------------|-------------------------------------------------------------------------------------------------------------------------------------------------------------------------------------------------------------------------------------------------------------------------------------------------------------------------------------------------------------------------------------------------------------------------------------------|--------------------|--------------------|--------------------|
| 1     | 4-Aminobiphenyl            | 170.0970[M-C <sub>12</sub> H <sub>12</sub> N+H] <sup>+</sup><br>92.0500[M-C <sub>6</sub> H <sub>6</sub> N+H] <sup>+</sup><br>192.0661[M-C <sub>10</sub> H <sub>10</sub> NO <sub>3</sub> +H] <sup>+</sup>                                                                                                                                                                                                                                  | 219473.6±64056.1   | 140205.6±28025.2   | 124214.6±18597.0   |
| 2     | 5-Hydroxyindoleacetic acid | 146.0606[M-C <sub>9</sub> H <sub>8</sub> NO+H] <sup>+</sup><br>119.0497[M-C <sub>8</sub> H <sub>7</sub> O+H] <sup>+</sup><br>137.0463[M+H] <sup>+</sup><br>119.0358[M-C <sub>5</sub> H <sub>3</sub> N <sub>4</sub> +H] <sup>+</sup>                                                                                                                                                                                                       | 6598.2±1788.2      | 9844.9±1861.8      | 9962.3±1831.7      |
| 3     | Hypoxanthine               | 111.0433[M-C <sub>4</sub> H <sub>5</sub> N <sub>3</sub> O+H] <sup>+</sup><br>94.0405[M-C <sub>4</sub> H <sub>4</sub> N <sub>3</sub> +H] <sup>+</sup><br>82.0405[M-C <sub>3</sub> H <sub>4</sub> N <sub>3</sub> +H] <sup>+</sup><br>67.0296[M-C <sub>3</sub> H <sub>3</sub> N <sub>2</sub> +H] <sup>+</sup><br>159.0684[M-C <sub>10</sub> H <sub>9</sub> NO+H] <sup>+</sup><br>143.0735[M-C <sub>10</sub> H <sub>9</sub> N+H] <sup>+</sup> | 237277.4±1699.8    | 54983.3±32049.1    | 210672.5±66108.1   |
| 4     | Indoleacetaldehyde         | 133.0653[M-C <sub>9</sub> H <sub>9</sub> O+H] <sup>+</sup><br>130.0657[M-C <sub>9</sub> H <sub>8</sub> N+H] <sup>+</sup><br>117.0578[M-C <sub>8</sub> H <sub>7</sub> N+H] <sup>+</sup><br>105.0704[M-C <sub>8</sub> H <sub>9</sub> +H] <sup>+</sup>                                                                                                                                                                                       | 1680130.2±159679.0 | 2118058.0±212232.6 | 1811561.0±265189.3 |
| 5     | L-Acetylcarnitine          | 146.0453[M-C <sub>5</sub> H <sub>8</sub> NO <sub>4</sub> +H] <sup>+</sup><br>119.0582[M-C <sub>5</sub> H <sub>9</sub> O+H] <sup>+</sup><br>464.3141[M-C <sub>23</sub> H <sub>47</sub> NO <sub>6</sub> P+H] <sup>+</sup>                                                                                                                                                                                                                   | 1327410.0±133772.1 | 1917996.4±213318.1 | 1252613.9±511906.7 |
| 6     | LysoPC (15:0)              | 299.2586[M-C <sub>18</sub> H <sub>35</sub> O <sub>3</sub> +H] <sup>+</sup><br>166.0633[M-C <sub>5</sub> H <sub>13</sub> NO <sub>3</sub> P+H] <sup>+</sup><br>87.1048[M-C <sub>5</sub> H <sub>13</sub> N+H] <sup>+</sup>                                                                                                                                                                                                                   | 1364289.0±421351.7 | 2046426.6±306488.1 | 2943568.4±215280.1 |

|    |                                 |                                                                                                                                                                                                                                                                                                                                                                                                                                                                     |                     |                      |                      |
|----|---------------------------------|---------------------------------------------------------------------------------------------------------------------------------------------------------------------------------------------------------------------------------------------------------------------------------------------------------------------------------------------------------------------------------------------------------------------------------------------------------------------|---------------------|----------------------|----------------------|
| 7  | LysoPC (16:1(9Z))               | 476.314[M-C <sub>24</sub> H <sub>47</sub> NO <sub>6</sub> P+H] <sup>+</sup><br>311.2586[M-C <sub>19</sub> H <sub>35</sub> O <sub>3</sub> +H] <sup>+</sup><br>258.102[M-C <sub>12</sub> H <sub>19</sub> O <sub>4</sub> P+H] <sup>+</sup><br>185.0814[M-C <sub>9</sub> H <sub>13</sub> O <sub>4</sub> +H] <sup>+</sup><br>166.0633[M-C <sub>5</sub> H <sub>13</sub> NO <sub>3</sub> P+H] <sup>+</sup><br>86.0970[M-C <sub>5</sub> H <sub>12</sub> N+H] <sup>+</sup>   | 8810133.0±2502729.7 | 12351954.0±1076532.0 | 10510191.8±1109790.2 |
| 8  | LysoPC (17:0)                   | 492.3454[M-C <sub>25</sub> H <sub>51</sub> NO <sub>6</sub> P+H] <sup>+</sup><br>433.2719[M-C <sub>22</sub> H <sub>42</sub> O <sub>6</sub> P+H] <sup>+</sup><br>327.2899[M-C <sub>20</sub> H <sub>39</sub> O <sub>3</sub> +H] <sup>+</sup><br>185.0814[M-C <sub>9</sub> H <sub>13</sub> O <sub>4</sub> +H] <sup>+</sup><br>166.0633[M-C <sub>5</sub> H <sub>13</sub> NO <sub>3</sub> P+H] <sup>+</sup><br>87.1048[M-C <sub>5</sub> H <sub>13</sub> N+H] <sup>+</sup> | 594946.2±183986.3   | 928482.6±75309.5     | 1459741.2±129619.6   |
| 9  | LysoPC (18:0)                   | 341.3056[M-C <sub>21</sub> H <sub>41</sub> O <sub>3</sub> +H] <sup>+</sup><br>186.0892[M-C <sub>9</sub> H <sub>14</sub> O <sub>4</sub> +H] <sup>+</sup><br>86.0970[M-C <sub>5</sub> H <sub>12</sub> N+H] <sup>+</sup>                                                                                                                                                                                                                                               | 137107.9±49814.4    | 216182.5±30099.7     | 180262.4±34408.6     |
| 10 | LysoPC (18:1(9Z))               | 504.3454[M-C <sub>26</sub> H <sub>51</sub> NO <sub>6</sub> P+H] <sup>+</sup><br>185.0814 [M-C <sub>9</sub> H <sub>13</sub> O <sub>4</sub> +H] <sup>+</sup><br>125.0004[M-C <sub>2</sub> H <sub>6</sub> O <sub>4</sub> P+H] <sup>+</sup><br>86.0970[M-C <sub>5</sub> H <sub>12</sub> N+H] <sup>+</sup>                                                                                                                                                               | 73398318.0±49814.4  | 105965418.0±30099.6  | 134756860.0±34408.6  |
| 11 | LysoPC (18:3(6Z,9Z,12Z))        | 335.2586[M-C <sub>21</sub> H <sub>35</sub> O <sub>3</sub> +H] <sup>+</sup><br>184.0736[M-C <sub>9</sub> H <sub>12</sub> O <sub>4</sub> +H] <sup>+</sup><br>166.0633[M-C <sub>5</sub> H <sub>13</sub> NO <sub>3</sub> P+H] <sup>+</sup><br>86.0970[M-C <sub>5</sub> H <sub>12</sub> N+H] <sup>+</sup>                                                                                                                                                                | 2153124.0±476753.1  | 2726491.8±265249.8   | 2725450.0±388029.0   |
| 12 | LysoPC(18:4(6Z,9Z,12Z,15Z)<br>) | 500.3141[M-C <sub>26</sub> H <sub>47</sub> NO <sub>6</sub> P+H] <sup>+</sup><br>459.2386[M-C <sub>22</sub> H <sub>38</sub> NO <sub>7</sub> P+H] <sup>+</sup>                                                                                                                                                                                                                                                                                                        | 280823.2±94306.5    | 430853.9±49376.6     | 377609.9±105188.4    |

|    |                                     |                                                                                                                                                                                                                                                                                                                                                                                  |                    |                    |                    |
|----|-------------------------------------|----------------------------------------------------------------------------------------------------------------------------------------------------------------------------------------------------------------------------------------------------------------------------------------------------------------------------------------------------------------------------------|--------------------|--------------------|--------------------|
|    |                                     | 457.2355[M-C <sub>23</sub> H <sub>38</sub> O <sub>7</sub> P+H] <sup>+</sup><br>185.0814[M-C <sub>9</sub> H <sub>13</sub> O <sub>4</sub> +H] <sup>+</sup><br>146.9847[M-C <sub>4</sub> H <sub>4</sub> O <sub>4</sub> P+H] <sup>+</sup><br>125.0004[M-C <sub>2</sub> H <sub>6</sub> O <sub>4</sub> P+H] <sup>+</sup><br>86.0970[M-C <sub>5</sub> H <sub>12</sub> N+H] <sup>+</sup> |                    |                    |                    |
| 13 | LysoPC (20:3(5Z,8Z,11Z))            | 489.2855[M-C <sub>24</sub> H <sub>44</sub> NO <sub>7</sub> P+H] <sup>+</sup><br>487.2825V[C <sub>25</sub> H <sub>44</sub> O <sub>7</sub> P+H] <sup>+</sup><br>146.9847[M-C <sub>4</sub> H <sub>4</sub> O <sub>4</sub> P+H] <sup>+</sup>                                                                                                                                          | 1017837.0±401249.0 | 1876566.4±303286.4 | 2167516.7±171787.3 |
| 14 | LysoPC<br>(20:4(5Z,8Z,11Z,14Z))     | 486.2621[M-C <sub>24</sub> H <sub>41</sub> NO <sub>7</sub> P+H] <sup>+</sup><br>184.0736[M-C <sub>9</sub> H <sub>12</sub> O <sub>4</sub> +H] <sup>+</sup><br>146.9847[M-C <sub>4</sub> H <sub>4</sub> O <sub>4</sub> P+H] <sup>+</sup>                                                                                                                                           | 2803618.0±947215.5 | 4002222.4±296092.6 | 3805189.8±318314.9 |
| 15 | LysoPC<br>(20:5(5Z,8Z,11Z,14Z,17Z)) | 524.3141[M-C <sub>28</sub> H <sub>47</sub> NO <sub>6</sub> P+H] <sup>+</sup><br>359.2586[M-C <sub>23</sub> H <sub>35</sub> O <sub>3</sub> +H] <sup>+</sup><br>285.2218[M-C <sub>20</sub> H <sub>29</sub> O+H] <sup>+</sup><br>166.0633[M-C <sub>5</sub> H <sub>13</sub> NO <sub>3</sub> P+H] <sup>+</sup><br>86.0970[M-C <sub>5</sub> H <sub>12</sub> N+H] <sup>+</sup>          | 140280.80±50864.8  | 298114.18±75689.2  | 228907.3±46201.7   |
| 16 | LysoPC (P-18:1(9Z))                 | 448.2828[M-C <sub>22</sub> H <sub>43</sub> NO <sub>6</sub> P+H] <sup>+</sup><br>181.0266[M-C <sub>5</sub> H <sub>10</sub> O <sub>5</sub> P+H] <sup>+</sup><br>163.0160[M-C <sub>5</sub> H <sub>8</sub> O <sub>4</sub> P+H] <sup>+</sup><br>86.0970[M-C <sub>5</sub> H <sub>12</sub> N+H] <sup>+</sup>                                                                            | 247245.8±96590.7   | 475756.5±73994.7   | 665285.3±34345.7   |
| 17 | Retinal                             | 285.2218[M-C <sub>20</sub> H <sub>29</sub> O+H] <sup>+</sup><br>241.1956[M-C <sub>18</sub> H <sub>25</sub> +H] <sup>+</sup><br>211.1487[M-C <sub>16</sub> H <sub>19</sub> +H] <sup>+</sup><br>145.1017[M-C <sub>11</sub> H <sub>13</sub> +H] <sup>+</sup><br>14131.0861[M-C <sub>10</sub> H <sub>11</sub> +H] <sup>+</sup>                                                       | 377704.0±51049.4   | 496073.0±75288.8   | 368522.0±74337.8   |

|    |                       |                                                                                                                                                                                                                                                                                                                                                                                                                         |                     |                     |                      |
|----|-----------------------|-------------------------------------------------------------------------------------------------------------------------------------------------------------------------------------------------------------------------------------------------------------------------------------------------------------------------------------------------------------------------------------------------------------------------|---------------------|---------------------|----------------------|
| 18 | Retinyl ester         | 303.2324[M-C <sub>20</sub> H <sub>31</sub> O <sub>2</sub> +H] <sup>+</sup><br>131.0861[M-C <sub>10</sub> H <sub>11</sub> +H] <sup>+</sup><br>119.0861[M-C <sub>9</sub> H <sub>11</sub> +H] <sup>+</sup>                                                                                                                                                                                                                 | 3635709.0±79274.9   | 4902010.4±749247.3  | 3663042.10±699070.7  |
| 19 | Uric acid             | 169.0362[M-C <sub>5</sub> H <sub>5</sub> N <sub>4</sub> O <sub>3</sub> +H] <sup>+</sup><br>151.0256[M-C <sub>5</sub> H <sub>3</sub> N <sub>4</sub> O <sub>2</sub> +H] <sup>+</sup><br>126.0304[M-C <sub>4</sub> H <sub>4</sub> N <sub>3</sub> O <sub>2</sub> +H] <sup>+</sup><br>96.0198[M-C <sub>3</sub> H <sub>2</sub> N <sub>3</sub> O+H] <sup>+</sup><br>69.0089[M-C <sub>2</sub> HN <sub>2</sub> O+H] <sup>+</sup> | 997596.6±254464.0   | 1485024±388194.8    | 835745.3±466693.5    |
| 20 | 15(S)-HETE            | 119.0497[M--H] <sup>-</sup>                                                                                                                                                                                                                                                                                                                                                                                             | 7456424.0±1161624.9 | 9692761.0±1485045.5 | 13184068.0±1315254.9 |
| 21 | 2-Hydroxybutyric acid | 103.04[M-H] <sup>-</sup>                                                                                                                                                                                                                                                                                                                                                                                                | 34815.1±6908.5      | 57588.8±12965.7     | 23034.7±18463.9      |
| 22 | 4-Pyridoxic acid      | 182.0453[M-H] <sup>-</sup> 156.0423[M--H] <sup>-</sup><br>155.0582[M-C <sub>7</sub> H <sub>9</sub> NO <sub>3</sub> -H] <sup>-</sup>                                                                                                                                                                                                                                                                                     | 31224.8±4096.6      | 22901.9±5510.6      | 20077.3±2140.1       |
| 23 | 6-Deoxocastasterone   | 450.3709[M-C <sub>28</sub> H <sub>50</sub> O <sub>4</sub> -H] <sup>-</sup><br>449.3631[M-C <sub>28</sub> H <sub>49</sub> O <sub>4</sub> -H] <sup>-</sup><br>431.3525[M-C <sub>28</sub> H <sub>47</sub> O <sub>3</sub> -H] <sup>-</sup><br>387.3627[M-C <sub>27</sub> H <sub>47</sub> O-H] <sup>-</sup>                                                                                                                  | 47312.6±28058.7     | 9074.9±7130.3       | 17370.8±8382.5       |
| 24 | Eicosapentaenoic acid | 283.2062[M-C <sub>20</sub> H <sub>27</sub> O-H] <sup>-</sup><br>257.2269[M-C <sub>19</sub> H <sub>29</sub> -H] <sup>-</sup><br>229.1956[M-C <sub>3</sub> H <sub>4</sub> O <sub>2</sub> -H] <sup>-</sup><br>175.1487[M-C <sub>13</sub> H <sub>19</sub> -H] <sup>-</sup>                                                                                                                                                  | 471430.4±78453.0    | 613586.1±88934.8    | 935282.2±87894.0     |
| 25 | Linoleic acid         | 263.2375[M-C <sub>18</sub> H <sub>31</sub> O-H] <sup>-</sup>                                                                                                                                                                                                                                                                                                                                                            | 1746.5±758.2        | 819.9±302.1         | 1704.1±1290.9        |
| 26 | LPA (0:0/16:0)        | 341.1882[M-C <sub>18</sub> H <sub>30</sub> O <sub>4</sub> P-H] <sup>-</sup><br>325.1780[M-C <sub>14</sub> H <sub>30</sub> O <sub>6</sub> P-H] <sup>-</sup><br>255.2324[M-C <sub>16</sub> H <sub>31</sub> O <sub>2</sub> -H] <sup>-</sup>                                                                                                                                                                                | 48305.6±23807.9     | 94187.7±23684.7     | 60220.7±13426.8      |

|    |               |                                                                             |                   |                  |                   |
|----|---------------|-----------------------------------------------------------------------------|-------------------|------------------|-------------------|
|    |               | 171.0059[M-C <sub>3</sub> H <sub>8</sub> O <sub>6</sub> P-H] <sup>-</sup>   |                   |                  |                   |
|    |               | 152.9953[M-C <sub>3</sub> H <sub>6</sub> O <sub>5</sub> P-H] <sup>-</sup>   |                   |                  |                   |
|    |               | 78.9585[M-O <sub>3</sub> P-H] <sup>-</sup>                                  |                   |                  |                   |
|    |               | 242.0794[M-C <sub>7</sub> H <sub>17</sub> NO <sub>6</sub> P-H] <sup>-</sup> |                   |                  |                   |
| 27 | LysoPC (16:0) | 224.0688[M-C <sub>7</sub> H <sub>15</sub> NO <sub>5</sub> P-H] <sup>-</sup> | 436486.5±162856.2 | 691035.0±63278.0 | 1024862.1±68239.0 |
|    |               | 152.9953[M-C <sub>3</sub> H <sub>6</sub> O <sub>5</sub> P-H] <sup>-</sup>   |                   |                  |                   |
|    |               | 78.9585[M-O <sub>3</sub> P-H] <sup>-</sup>                                  |                   |                  |                   |
| 28 | Stearic acid  | 265.2531[M-C <sub>18</sub> H <sub>33</sub> O-H] <sup>-</sup>                | 168738.8±53758.8  | 261246.2±57217.3 | 323997.3±17676.1  |

---

Table S2 Relative pathways and enzymes of biomarkers in APC<sup>min/+</sup> mice

| Biomarkers                 | Pathways                                              | Enzymes                                                                    |
|----------------------------|-------------------------------------------------------|----------------------------------------------------------------------------|
| 4-Pyridoxic acid           | map00750 Vitamin B6 metabolism                        | 1.2.3.1 aldehyde oxidase                                                   |
|                            | map01100 Metabolic pathways                           | 1.2.3.8 pyridoxal oxidase                                                  |
|                            | map01120 Microbial metabolism in diverse environments | 3.1.1.27 4-pyridoxolactonase                                               |
| 5-Hydroxyindoleacetic acid | map00380 Tryptophan metabolism                        | 1.2.1.3 aldehyde dehydrogenase (NAD <sup>+</sup> )                         |
|                            |                                                       | 1.2.3.1 aldehyde oxidase                                                   |
|                            |                                                       | 2.1.1.4 acetylserotonin O-methyltransferase                                |
| 6-Deoxocastasterone        | map00905 Brassinosteroid biosynthesis                 | 1.14.-.-                                                                   |
|                            | map01100 Metabolic pathways                           |                                                                            |
|                            | map01110 Biosynthesis of secondary metabolites        |                                                                            |
| Eicosapentaenoic acid      | map01040 Biosynthesis of unsaturated fatty acids      | 3.1.2.2 palmitoyl-CoA hydrolase<br>5.3.3.13 polyenoic fatty acid isomerase |
|                            |                                                       |                                                                            |
| Hypoxanthine               | map00230 Purine metabolism                            | 1.17.1.4 xanthine dehydrogenase                                            |
|                            | map01100 Metabolic pathways                           | 1.17.3.2 xanthine oxidase                                                  |
|                            |                                                       | 2.4.2.1 purine-nucleoside phosphorylase                                    |
|                            |                                                       | 2.4.2.4 thymidine phosphorylase                                            |
|                            |                                                       | 2.4.2.8 hypoxanthine phosphoribosyltransferase                             |
|                            |                                                       | 2.4.2.15 guanosine phosphorylase                                           |
|                            |                                                       | 2.4.2.44 S-methyl-5'-thioinosine phosphorylase <sub>3</sub>                |
|                            |                                                       | .2.2.1 purine nucleosidase                                                 |
|                            |                                                       | 3.2.2.2 inosine nucleosidase                                               |
|                            |                                                       | 3.2.2.12 inosinate nucleosidase                                            |
|                            |                                                       | 3.2.2.26 fufalosine hydrolase                                              |
|                            |                                                       | 3.5.4.2 adenine deaminase                                                  |
|                            | L-Acetylcarnitine                                     | map04931 Insulin resistance                                                |



---

|                                 |          |                                             |                    |                                                     |
|---------------------------------|----------|---------------------------------------------|--------------------|-----------------------------------------------------|
| Linoleic acid                   | map00591 | Linoleic acid metabolism                    | 1.13.11.12         | acyl-lipid Delta12-acetylenase                      |
|                                 | map01040 | Biosynthesis of unsaturated fatty acids     | 1.13.11.33         | arachidonate 15-lipoxygenase                        |
|                                 |          |                                             | 1.13.11.45         | linoleate 11-lipoxygenase                           |
|                                 | map01060 | Biosynthesis of plant secondary metabolites | 1.13.11.58         | linoleate 9S-lipoxygenase                           |
|                                 |          |                                             | 1.13.11.60         | linoleate 8R-lipoxygenase                           |
|                                 | map01100 | Metabolic pathways                          | 1.13.11.62         | linoleate 10R-lipoxygenase                          |
|                                 |          |                                             | 1.13.11.77         | oleate 10S-lipoxygenase                             |
|                                 |          |                                             | 1.14.14.1          | unspecific monooxygenase                            |
|                                 |          |                                             | 1.14.19.3          | acyl-CoA 6-desaturase                               |
|                                 |          |                                             | 1.14.19.39         | acyl-lipid Delta12-acetylenase                      |
| LysoPC(20:5(5Z,8Z,11Z,14Z,17Z)) | map00564 | Glycerophospholipid metabolism              | 2.3.1.23           | L-acylglycerophosphocholine O-acyltransferase       |
|                                 | map05231 | Choline metabolism in cancer                | 2.3.1.43           | phosphatidylcholine-sterol O-acyltransferase        |
|                                 |          |                                             | 2.3.1.83           | phosphatidylcholine-dolichol O-acyltransferase      |
|                                 |          |                                             | 3.1.1.4            | phospholipase A                                     |
|                                 |          |                                             | 3.1.2.2            | palmitoyl-CoA hydrolase                             |
|                                 |          |                                             | 5.2.1.5            | linoleate isomerase                                 |
|                                 |          |                                             | 3.1.1.4            | phospholipase A2                                    |
|                                 |          |                                             | 3.1.1.5            | lysophospholipase                                   |
|                                 |          |                                             | 5.4.1.1            | lysolecithinacylmutase                              |
|                                 | Retinal  | map00830                                    | Retinol metabolism | 1.1.1.1                                             |
| map01100                        |          | Metabolic pathways                          | 1.1.1.105          | all-trans-retinol dehydrogenase (NAD <sup>+</sup> ) |
| map04744                        |          | Phototransduction                           | 1.1.1.300          | NADP-retinol dehydrogenase                          |
| map04977                        |          | Vitamin digestion and absorption            | 1.2.1.36           | retinal dehydrogenase                               |
|                                 |          |                                             | 1.2.3.1            | aldehyde oxidase                                    |
|                                 |          |                                             | 1.13.11.63         | beta-carotene 15,15'-dioxygenase                    |
|                                 |          |                                             | 1.13.11.75         | all-trans-8'-apo-beta-carotenal 15,15'-oxygenase    |
| Retinyl ester                   | map00830 | Retinol metabolism                          | 2.3.1.76           | retinol O-fatty-acyltransferase                     |
|                                 | map04977 | Vitamin digestion and absorption            | 2.3.1.135          | phosphatidylcholine-retinol O-acyltransferase       |
|                                 |          |                                             | 3.1.1.64           | retinoid isomerohydrolase                           |
|                                 |          |                                             | 3.1.1.90           | all-trans-retinyl ester 13-cis isomerohydrolase     |

---

---

|              |          |                                              |                                    |                                         |                  |                        |
|--------------|----------|----------------------------------------------|------------------------------------|-----------------------------------------|------------------|------------------------|
| Stearic acid | map00061 | Fatty acid biosynthesis                      | 3.1.2.2                            | palmitoyl-CoA hydrolase                 |                  |                        |
|              | map01040 | Biosynthesis of unsaturated fatty acids      | 3.1.2.14                           | oleoyl-[acyl-carrier-protein] hydrolase |                  |                        |
|              | map01060 | Biosynthesis of plant secondary metabolites  |                                    |                                         |                  |                        |
|              | map04745 | Phototransduction - fly                      |                                    |                                         |                  |                        |
| Uric acid    | map00230 | Purine metabolism                            | 1.7.3.3                            | factor-independent                      | urate            |                        |
|              | map01100 | Metabolic pathways                           |                                    | hydroxylase                             |                  |                        |
|              | map01120 | Microbial metabolism in diverse environments | 1.14.11.48                         | xanthine dioxygenase                    |                  |                        |
|              | map04976 | Bile secretion                               |                                    | 1.14.13.113                             | FAD-dependent    | urate                  |
|              |          |                                              |                                    |                                         | hydroxylase      |                        |
|              |          |                                              |                                    |                                         | 1.17.1.4         | xanthine dehydrogenase |
|              |          |                                              |                                    | 1.17.3.2                                | xanthine oxidase |                        |
|              |          | 2.4.2.16                                     | urate-ribonucleotide phosphorylase |                                         |                  |                        |
|              |          | 3.5.4.32                                     | 8-oxoguanine deaminase             |                                         |                  |                        |

---
